# Supplementary material
Source: Elsevier journal article supplement (https://www.sciencedirect.com/science/article/pii/S0048712020300906)
Supplement: mmc1 [file S0048712020300906:mmc1.pdf]

## ANEXO I

### Cuestionario clínico-epidemiológico para paciente durante la pandemia COVID-19

## CRIBADO CLÍNICO-EPIDEMIOLÓGICO DE COVID-19

### 1. IDENTIFICACIÓN DEL PACIENTE

|                                            |  |
|--------------------------------------------|--|
| Identificación (DNI, Fecha de nacimiento): |  |
| Nombre y apellido                          |  |
| Diagnóstico:                               |  |

### 2. IDENTIFICACIÓN DEL INFORME

|                        |       |
|------------------------|-------|
| Fecha:                 | Hora: |
| Informe realizado por: |       |

### 3. OBJETIVO DEL INFORME

|              |                    |              |                        |
|--------------|--------------------|--------------|------------------------|
| Atención en: | Consultas Externas | Gimnasio Rhb | Planta hospitalización |
|--------------|--------------------|--------------|------------------------|

### 4. INFORME CLÍNICO

| ¿Ha presentado en las últimas 2 semanas?                                                                  | SI | NO |
|-----------------------------------------------------------------------------------------------------------|----|----|
| Fiebre mayor de 37º                                                                                       |    |    |
| Tos seca                                                                                                  |    |    |
| Dificultad respiratoria                                                                                   |    |    |
| Fatiga severa (cansancio)                                                                                 |    |    |
| Dolor muscular                                                                                            |    |    |
| Falta de olor                                                                                             |    |    |
| Falta de gusto                                                                                            |    |    |
| Diarrea, náuseas o vómitos                                                                                |    |    |
| Alteraciones en los ojos tipo conjuntivitis                                                               |    |    |
| Alguna lesión cutánea                                                                                     |    |    |
| ¿Existe algún motivo que justifique los síntomas por parte del paciente?                                  |    |    |
|                                                                                                           |    |    |
| ¿Ha acudido al hospital, al centro de salud o llamado al centro de atención por alguno de estos síntomas? |    |    |
| En caso afirmativo, ¿qué actitud le dijeron que tomara?                                                   |    |    |
|                                                                                                           |    |    |

## ANEXO II

Modelo de Consentimiento informado complementario para asistencia sanitaria durante la pandemia COVID-19 complementario al consentimiento específico de la asistencia sanitaria aplicada.

| CONSENTIMIENTO INFORMADO PARA ASISTENCIA<br>SANITARIA DURANTE LA PANDEMIA COVID-19                                                                                                                                                                                                                                                                                                                                                                                                                                                                                                                                                                                                                                              |  |
|---------------------------------------------------------------------------------------------------------------------------------------------------------------------------------------------------------------------------------------------------------------------------------------------------------------------------------------------------------------------------------------------------------------------------------------------------------------------------------------------------------------------------------------------------------------------------------------------------------------------------------------------------------------------------------------------------------------------------------|--|
| D/Dña. _____, con DNI _____,<br>por la presente solicito del Médico/Fisioterapeuta colegiado/a D./Dña. _____<br>la prestación de sus servicios profesionales.                                                                                                                                                                                                                                                                                                                                                                                                                                                                                                                                                                   |  |
| Dada la situación de pandemia por COVID-19, como paciente soy consciente de que adoptaré las medidas de prevención de contagio de la enfermedad y de seguridad e higiene personales, para poder mantener contacto con el profesional sanitario.                                                                                                                                                                                                                                                                                                                                                                                                                                                                                 |  |
| Además, manifiesto que he facilitado al Médico/Fisioterapeuta toda la información sobre mi estado actual de salud, sobre todo en lo que se refiere a no tener ningún tipo de síntoma o sospechas de estar afectado por la infección COVID-19, ni haber estado en contacto con personas afectadas o sospechosas (indicar si presenta alguno de los síntomas y signos que se indican a continuación):                                                                                                                                                                                                                                                                                                                             |  |
| o Fiebre o Tos o Dificultad para respirar (sensación de falta el aire)<br>o Temblores y escalofríos que no ceden o Dolor muscular o Dolor de cabeza o Dolor de garganta<br>o Pérdida reciente del olfato o el gusto                                                                                                                                                                                                                                                                                                                                                                                                                                                                                                             |  |
|                                                                                                                                                                                                                                                                                                                                                                                                                                                                                                                                                                                                                                              |  |
| Si usted se encuentra en alguna de las anteriores circunstancias, deberá comunicarlo al Médico/Fisioterapeuta.                                                                                                                                                                                                                                                                                                                                                                                                                                                                                                                                                                                                                  |  |
| El Médico/Fisioterapeuta D/Dña. _____ ha tomado todas las medidas exigibles para prevenir el contagio de la infección COVID-19, y así lo constata el/la paciente, de forma que le exonera de cualquier tipo de consecuencia que se pueda derivar del tratamiento asistencial, siempre que no sean fruto de la mala praxis profesional. El paciente es conocedor del alto riesgo de contagio por la propia naturaleza de la consulta presencial/tratamientos fisioterapéuticos, dado que implican un traslado a un Centro sanitario y el contacto directo y cercano entre el paciente y el profesional sanitario, y no se puede garantizar un riesgo nulo de transmisión, aún usando todos los medios de protección disponibles. |  |
| Información básica sobre Protección de datos                                                                                                                                                                                                                                                                                                                                                                                                                                                                                                                                                                                                                                                                                    |  |
| De acuerdo con lo establecido por el Reglamento (UE) 2016/679 del Parlamento Europeo y del Consejo, y de la Ley 3/2018 de Protección de Datos Personales y Garantía de los Derechos Digitales le informamos que los datos personales aportados serán tratados por D./Dña. _____, con domicilio en _____ (España).                                                                                                                                                                                                                                                                                                                                                                                                               |  |

**Finalidad:** Los datos aportados por usted son necesarios para la realización del cuestionario para la prevención de la salud en paciente y fisioterapeutas del Centro Sanitario en relación con la epidemia de COVID-19.

**Legitimación:** Los intereses legítimos del Responsable del Tratamiento para realizar el tratamiento de sus datos son:

1. Misión en Interés público: Prevención en la propagación de la epidemia COVID-19, tanto al personal propio como a la población en bien del interés público en general; medidas publicadas en el Real Decreto 465/2020, de 17 de marzo, por el que se modifica el Real Decreto 463/2020, de 14 de marzo, por el que se declara el estado de alarma para la gestión de la situación de crisis sanitaria ocasionada por el COVID-19.
2. Cumplimiento de una obligación legal: Ley 31/1995, de 8 de noviembre, de prevención de Riesgos Laborales.

**Destinatarios:** Sobre los destinatarios de los datos, están previstas posibles cesiones de datos a: Entidades sanitarias; Fuerzas y Cuerpos de la Seguridad; Organismos de la Seguridad Social.

**Derechos:** Tiene derecho a acceder, rectificar y suprimir los datos, así como otros derechos, indicados en la información adicional, que puede ejercer dirigiéndose a la dirección \_\_\_\_\_@\_\_\_\_\_ o \_\_\_\_\_ (España).

**Procedencia:** Los datos proceden del propio interesado o su representante legal.

Y para que así conste, y en prueba de conformidad y de haber entendido la información facilitada por el Médico/Fisioterapeuta y habiendo aclarado las dudas que le he planteado, firma el presente documento.

En \_\_\_\_\_, a \_\_\_\_\_ de \_\_\_\_\_ de 2020.

Firma:

## ANEXO III

Modelo de consulta telefónica en el linfedema de miembro superior durante la pandemia COVID-19

# MODELO DE CONSULTA TELEFÓNICA LINFEDEMA MIEMBRO SUPERIOR

## 1- PREPARACIÓN

Decidir si llamada telefónica o videollamada o va a ser presencial y adelantamos la fase de entrevista.

## 2- CONEXIÓN

Buenos días, le llamo del Servicio de Rehabilitación del Hospital, en relación a la consulta que tenía el día \_\_\_\_\_. ¿Cree Ud. que podemos hacerla telefónica?

|                                        |                                                                   |              |                     |
|----------------------------------------|-------------------------------------------------------------------|--------------|---------------------|
| Comprobar audio/video<br>¿Puede oírme? | Confirmar identidad del paciente<br>Nombre<br>Fecha de nacimiento | ¿Dónde está? | ¿Cómo se encuentra? |
|----------------------------------------|-------------------------------------------------------------------|--------------|---------------------|

## 3- CONSULTA SUCESIVA

- ¿A Ud. ya le veíamos por LINFEDEMA RELACIONADO CON CÁNCER DE MAMA EN MSI
- ¿está libre de enfermedad? ¿Cuándo le vieron en Oncología?
- ¿Ha tenido algún episodio de linfangitis?
- ¿Cómo tiene el volumen, está estable?
- De peso, ¿cómo va?
- ¿Cumplimenta su prenda de compresión? ¿Cuántas horas se la pone? ¿Todos los días? ¿Y se venda por la noche?
- ¿Hace sus ejercicios diariamente?
- ¿Necesita receta de prenda de compresión?
- ¿Aún está en buen estado? ¿Le adapta bien?

## 4- EVALUACIÓN

- Coja un metro de costura y mídase el perímetro en la muñeca y en el codo, anótelos. Ahora mida los mismos puntos en el otro brazo.
- Levante el brazo, diga si nota algún dolor o limitación en la movilidad.

## 5- PLAN

- Debe seguir cuidándose, para ello es importante que siga las medidas preventivas que le enseñaron en el hospital, evitar cargar peso, evitar agresiones en esa extremidad, cuidar la piel y hacer los ejercicios diariamente.
- Debe llevar su prenda de compresión y renovarla cuando sea necesario.
- Si necesita una prenda nueva, le haremos la receta y se la enviaremos por correo electrónico a Ud. o a su ortopedia de confianza, según Ud. autorice. Póngase en contacto con la ortopedia para programar el momento más adecuado para la toma de medidas.
- Para revisar la adaptación, si no es correcta, pídanos cita y la revisaremos.

## 6- PROGRAMAR CITA

- Le programaremos una cita de revisión, la cita le llegará por correo.
- Si antes de ese día tiene algún problema, llame y se la adelantaremos.

## ANEXO IV

Modelo de consulta telefónica en el linfedema de miembro inferior durante la pandemia COVID-19

# MODELO DE CONSULTA TELEFÓNICA LINFEDEMA MIEMBRO INFERIOR

## 1. PREPARACIÓN

Decidir si llamada telefónica o videollamada o va a ser presencial y adelantamos la fase de entrevista.

## 2. CONEXIÓN

Buenos días, le llamo del Servicio de Rehabilitación del Hospital, en relación a la consulta que tenía el día \_\_\_\_\_. ¿Cree Ud. que podemos hacerla telefónica?

|                                        |                                                             |              |                     |
|----------------------------------------|-------------------------------------------------------------|--------------|---------------------|
| Comprobar audio/video<br>¿Puede oírme? | Confirmar identidad del paciente<br>Nombre/Fecha nacimiento | ¿Dónde está? | ¿Cómo se encuentra? |
|----------------------------------------|-------------------------------------------------------------|--------------|---------------------|

## 3. CONSULTA SUCESIVA

- A Ud. ya le veíamos por LINFEDEMA DE MIEMBRO INFERIOR IZQUIERDO/DERECHO/BILATERAL
- ¿está libre de enfermedad? ¿Cuándo le vieron en Oncología?
- ¿Ha tenido algún episodio de linfangitis aguda?
- ¿Tiene úlceras o le chorrea líquido por las piernas?
- ¿le han aparecido lesiones en la piel?
- ¿Cómo tiene el volumen, está estable?
- De peso, ¿cómo va?
- ¿Cómo tiene los dedos de los pies? ¿Están hinchados?
- Y a nivel genital, ¿nota hinchazón?
- ¿Hace sus ejercicios diariamente?
- ¿Cumplimenta su prenda de compresión? ¿Cuántas horas se la pone? ¿Todos los días? ¿Y se venda por la noche?
- ¿Utiliza el dispositivo de velcros por la noche?
- ¿Aún está en buen estado? ¿Le adapta bien?
- ¿Necesita receta de prenda de compresión?

VALORAR VISITA PRESENCIAL

## 4. EVALUACIÓN

- Coja un metro de costura y mídase el perímetro en el dorso del pie, el tobillo, en la pantorrilla y en el muslo, anótelos. Ahora mida los mismos puntos en la otra pierna.
- Levante la pierna, diga si nota algún dolor o limitación en la movilidad.

## 5. PLAN

- Debe seguir cuidándose, para ello es importante que siga las medidas preventivas que le enseñaron en el Hospital, evitar las agresiones, cuidar la piel y hacer los ejercicios diariamente.
- Debe llevar su prenda de compresión y renovarla cuando sea necesario.

- Si necesita una prenda nueva, le haremos la receta y se la enviaremos por correo electrónico a Ud. o a su ortopedia de confianza, según Ud. autorice. Póngase en contacto con la ortopedia para programar el momento más adecuado para la toma de medidas.
- Para revisar la adaptación, si no es correcta, pídanos cita y la revisaremos.

#### 6. PROGRAMAR CITA

- Le programaremos una cita de revisión, la cita le llegará por correo.
- Si antes de ese día tiene algún problema, llame y se la adelantaremos.

## ANEXO V

Recomendaciones para pacientes que van a ser tratados con fisioterapia durante la pandemia de COVID-19

### TRATAMIENTO DE FISIOTERAPIA: INDICACIONES PARA PACIENTES

1. Se ruega puntualidad en la hora de la cita.
2. Debe acudir con mascarilla.
3. Realizara higiene de manos al inicio y al final del tratamiento.
4. Deberá venir duchado y con ropa limpia a cada sesión.
5. No podrá hacer uso del móvil dentro de la sala de tratamiento.
6. Deben venir sin acompañante, salvo en caso de dependencia. Los niños serán acompañados únicamente por una persona.
7. Debe acudir sin complementos: pulseras, relojes, anillos...etc.
8. En caso de no encontrarse bien, avise y no acuda al tratamiento.
9. Si presentase alguno de estos síntomas consulte con su médico: fiebre, escalofríos, tos, dificultad para respirar (sensación de falta de aire), malestar y cansancio, dolor muscular generalizado, dolor de cabeza, dolor de garganta, diarrea y/o perdida reciente del gusto o del olfato.

Gracias por tu colaboración  
Cuidamos de tu salud



## ANEXO VI

Videos recomendables para la Educación Terapéutica de pacientes durante la pandemia COVID-19

### VÍDEOS PARA LA EDUCACIÓN TERAPÉUTICA DE PACIENTES

1. Enseñar las bases fisiológicas del sistema vascular, linfático y venoso básicas y sencillas para que el paciente entienda su alteración.
2. Reconocimiento de complicaciones: infecciones, trombosis venosa, dolor neuropático, úlceras y lesiones de la piel.
3. Higiene de la piel, lavado, secado e hidratación adecuada.
4. Reconocimiento y valoración de la piel (heridas, úlceras, descamación, grietas, pápulas, piel de naranja, infección por hongos, picaduras de insectos, cambios de temperatura o color...) y cómo manejarlos
5. Recomendaciones sobre ropa, calzado, mascotas, joyas, picaduras de insectos, calor, exposición solar, viajes.
6. Consejos dieta adecuada.
7. Ejercicios linfomocinéticos, respiración, ejercicios de fuerza y estiramientos.
8. Cómo colocar y quitar la prenda de compresión, cuidados durante la pandemia COVID-19, lavado y protección.
9. Autodrenaje de miembro superior e inferior y en linfedema de cara, cuello, genital y mama.
10. Autovendaje de miembro superior e inferior.
11. Uso y cuidados de los dispositivos de compresión autoajustables con velcros.
